# Supplementary material for: High-coverage whole-genome sequencing of the expanded 1000 Genomes Project cohort including 602 trios
Source: PubMed Central journal article supplement (PMC9439720; doi:10.1016/j.cell.2022.08.004), 2022-09-01
Supplement: mmc1.pdf [file mmc1.pdf]

**Cell, Volume 185**

**Supplemental information**

**High-coverage whole-genome sequencing of the  
expanded 1000 Genomes Project cohort  
including 602 trios**

**Marta Byrska-Bishop, Uday S. Evani, Xuefang Zhao, Anna O. Basile, Haley J. Abel, Allison A. Regier, André Corvelo, Wayne E. Clarke, Rajeeva Musunuri, Kshithija Nagulapalli, Susan Fairley, Alexi Runnels, Lara Winterkorn, Ernesto Lowy, Human Genome Structural Variation Consortium, Paul Flicek, Soren Germer, Harrison Brand, Ira M. Hall, Michael E. Talkowski, Giuseppe Narzisi, and Michael C. Zody**

## SUPPLEMENTAL TABLES

**Table S1. Sample counts in the expanded (3,202-sample) and original (2,504-sample) 1kGP cohort stratified by population, sex, and pedigree status, related to Figure 1.**

Thirteen samples are part of 2 trios (hence only 1,793 unique samples contribute to the 602 trios; not 1,806), either because they are part of a multi-generational family, i.e. are a child in one trio and a parent in another trio (HG00702, NA19685, NA19675), and/or because they are a part of a quad (5 quads were included in total) that was broken down into 2 trios when pedigree-based correction was applied following haplotype phasing (HG00656, HG00657, HG03642, HG03679, HG03943, HG03944, NA19660, NA19661, NA19678, NA19679). Super-population ancestry groups: European (EUR), African (AFR), East Asian (EAS), South Asian (SAS), American (AMR). Populations: African Caribbean in Barbados (ACB), People with African Ancestry in Southwest USA (ASW), Esan in Nigeria (ESN), Gambian in Western Division, Mandinka (GWD), Luhya in Webuye, Kenya (LWK), Mende in Sierra Leone (MSL), Yoruba in Ibadan, Nigeria (YRI), Colombians in Medellin, Colombia (CLM), People with Mexican Ancestry in Los Angeles, CA, USA (MXL), Peruvians in Lima, Peru (PEL), Puerto Ricans in Puerto Rico (PUR), Chinese Dai in Xishuangbanna, China (CDX), Han Chinese in Beijing, China (CHB), Han Chinese South, China (CHS), Japanese in Tokyo, Japan (JPT), Kinh in Ho Chi Minh City, Vietnam (KHV), Utah residents (CEPH) with Northern and Western European ancestry (CEU), Finnish in Finland (FIN), British from England and Scotland, UK (GBR), Iberian Populations in Spain (IBS), Toscani in Italia (TSI), Bengali in Bangladesh (BEB), Gujarati Indians in Houston, TX, USA (GIH), Indian Telugu in the UK (ITU), Punjabi in Lahore, Pakistan (PJT), Sri Lankan Tamil in the UK (STU).

| Population | Super-population | Sex<br>(1=male,<br>2=female) | # across<br>3,202<br>samples | # across<br>2,504<br>samples | # in trios | No. of trios |
|------------|------------------|------------------------------|------------------------------|------------------------------|------------|--------------|
| ACB        | AFR              | 1                            | 57                           | 47                           | 30         | 20           |
|            |                  | 2                            | 59                           | 49                           | 30         |              |
| ASW        | AFR              | 1                            | 33                           | 26                           | 20         | 13           |
|            |                  | 2                            | 41                           | 35                           | 19         |              |
| ESN        | AFR              | 1                            | 84                           | 53                           | 71         | 43           |
|            |                  | 2                            | 65                           | 46                           | 58         |              |
| GWD        | AFR              | 1                            | 93                           | 55                           | 91         | 58           |
|            |                  | 2                            | 85                           | 58                           | 83         |              |
| LWK        | AFR              | 1                            | 44                           | 44                           | 0          | 0            |
|            |                  | 2                            | 55                           | 55                           | 0          |              |
| MSL        | AFR              | 1                            | 50                           | 42                           | 16         | 11           |
|            |                  | 2                            | 49                           | 43                           | 17         |              |

|     |     |   |    |    |    |    |
|-----|-----|---|----|----|----|----|
| YRI | AFR | 1 | 97 | 52 | 92 | 56 |
|     |     | 2 | 81 | 56 | 76 |    |
| CLM | AMR | 1 | 58 | 43 | 48 | 35 |
|     |     | 2 | 74 | 51 | 57 |    |
| MXL | AMR | 1 | 43 | 32 | 40 | 32 |
|     |     | 2 | 54 | 32 | 50 |    |
| PEL | AMR | 1 | 54 | 41 | 47 | 35 |
|     |     | 2 | 68 | 44 | 58 |    |
| PUR | AMR | 1 | 70 | 54 | 51 | 35 |
|     |     | 2 | 69 | 50 | 54 |    |
| CDX | EAS | 1 | 44 | 44 | 0  | 0  |
|     |     | 2 | 49 | 49 | 0  |    |
| CHB | EAS | 1 | 46 | 46 | 0  | 0  |
|     |     | 2 | 57 | 57 | 0  |    |
| CHS | EAS | 1 | 86 | 52 | 80 | 51 |
|     |     | 2 | 77 | 53 | 70 |    |
| JPT | EAS | 1 | 56 | 56 | 0  | 0  |
|     |     | 2 | 48 | 48 | 0  |    |
| KHV | EAS | 1 | 60 | 46 | 34 | 21 |
|     |     | 2 | 62 | 53 | 29 |    |
| CEU | EUR | 1 | 87 | 49 | 84 | 57 |
|     |     | 2 | 92 | 50 | 87 |    |
| FIN | EUR | 1 | 38 | 38 | 0  | 0  |
|     |     | 2 | 61 | 61 | 0  |    |
| GBR | EUR | 1 | 46 | 46 | 0  | 0  |
|     |     | 2 | 45 | 45 | 0  |    |
| IBS | EUR | 1 | 81 | 54 | 77 | 50 |
|     |     | 2 | 76 | 53 | 73 |    |
| TSI | EUR | 1 | 53 | 53 | 0  | 0  |
|     |     | 2 | 54 | 54 | 0  |    |
| BEB | SAS | 1 | 60 | 42 | 41 | 30 |
|     |     | 2 | 71 | 44 | 49 |    |
| GIH | SAS | 1 | 56 | 56 | 0  | 0  |
|     |     | 2 | 47 | 47 | 0  |    |

|               |     |   |              |              |              |            |
|---------------|-----|---|--------------|--------------|--------------|------------|
| ITU           | SAS | 1 | 61           | 59           | 4            | 3          |
|               |     | 2 | 46           | 43           | 5            |            |
| PJL           | SAS | 1 | 77           | 48           | 65           | 42         |
|               |     | 2 | 69           | 48           | 61           |            |
| STU           | SAS | 1 | 65           | 55           | 16           | 10         |
|               |     | 2 | 49           | 47           | 10           |            |
| <b>Total:</b> |     |   | <b>3,202</b> | <b>2,504</b> | <b>1,793</b> | <b>602</b> |

**Table S2. Mean SNV density per 1 kb of sequence in the 3,202-sample high coverage call set, related to Figure 1.** Phased: SNV density in the phased high quality subset of SNV/INDEL calls; Genotyped: SNV density in the complete variant callset (based on VQSR PASS variants only).

| Chromosome | SNV Density per 1kb region |           |
|------------|----------------------------|-----------|
|            | Phased                     | Genotyped |
| chr1       | 21.88                      | 36.46     |
| chr2       | 23.89                      | 40.16     |
| chr3       | 23.89                      | 40.11     |
| chr4       | 24.39                      | 41.3      |
| chr5       | 23.76                      | 39.91     |
| chr6       | 23.99                      | 39.88     |
| chr7       | 24.61                      | 41.1      |
| chr8       | 25.5                       | 42.84     |
| chr9       | 21.76                      | 36.66     |
| chr10      | 24.77                      | 41.15     |
| chr11      | 24.11                      | 40.61     |
| chr12      | 23.65                      | 39.82     |
| chr13      | 24.22                      | 41.04     |
| chr14      | 23.93                      | 40.06     |
| chr15      | 23.52                      | 39.21     |
| chr16      | 24.78                      | 41.43     |
| chr17      | 23.39                      | 39.02     |
| chr18      | 23.25                      | 39.6      |
| chr19      | 26.62                      | 43.21     |
| chr20      | 24.23                      | 40.34     |
| chr21      | 22.84                      | 37.77     |
| chr22      | 25.03                      | 41.41     |
| chrX       | 17.04                      | 30.16     |

**Table S3. Average sample-level count of small variants per functional consequence category stratified by super-population, related to Figure 1.** Super-population ancestry labels: European (EUR), African (AFR), East Asian (EAS), South Asian (SAS), American (AMR).

| Filtering condition | Super-population | Functional consequence category |                         |            |          |            |
|---------------------|------------------|---------------------------------|-------------------------|------------|----------|------------|
|                     |                  | stop-gain                       | splice donor & acceptor | frameshift | missense | synonymous |
| No MAF filtering    | All              | 76                              | 314                     | 195        | 10,625   | 11,956     |
|                     | AFR              | 83                              | 365                     | 215        | 12,071   | 13,795     |
|                     | EUR              | 73                              | 287                     | 188        | 9,974    | 11,154     |
|                     | EAS              | 73                              | 302                     | 186        | 10,042   | 11,171     |
|                     | SAS              | 74                              | 296                     | 190        | 10,232   | 11,454     |
|                     | AMR              | 76                              | 297                     | 190        | 10,213   | 11,461     |
| MAF $\leq$ 1%       | All              | 11                              | 18                      | 14         | 754      | 569        |
|                     | AFR              | 15                              | 30                      | 22         | 1,215    | 1,044      |
|                     | EUR              | 9                               | 12                      | 10         | 540      | 353        |
|                     | EAS              | 10                              | 14                      | 12         | 594      | 398        |
|                     | SAS              | 10                              | 14                      | 12         | 648      | 453        |
|                     | AMR              | 10                              | 13                      | 11         | 567      | 387        |

**Table S4. Count of SV sites at the cohort and sample level, related to Figure 2.** SV types: DEL: deletion, DUP: duplication, mCNV: multiallelic copy number variant, INS: insertion, INV: inversion, BND: breakends, CPX: complex SV, CTX: inter-chromosomal translocation.

| SV TYPE | # SV sites across 3,202 samples |         |          | # SVs / sample |         |          |
|---------|---------------------------------|---------|----------|----------------|---------|----------|
|         | GATK-SV                         | svtools | Absinthe | GATK-SV        | svtools | Absinthe |
| INS     | 48,333                          | 75,283  | 7,183    | 3,019          | 1,761   | 2,270    |
| DEL     | 89,445                          | 65,184  | -        | 3,783          | 3,417   | -        |
| DUP     | 26,353                          | 10,594  | -        | 990            | 459     | -        |
| INV     | 381                             | 1,447   | -        | 12             | 127     | -        |
| BND     | 82,218                          | 26,152  | -        | -              | 2,188   | -        |
| CPX     | 3,624                           | -       | -        | 216            | -       | -        |
| CTX     | 16                              | -       | -        | 1              | -       | -        |
| mCNV    | 674                             | -       | -        | 385            | -       | -        |
| ALL     | 251,044                         | 178,660 | 7,183    | 8,406          | 7,952   | 2,270    |

**Table S5. Quality of SVs evaluated by PacBio support and inheritance, related to Figure 2.**  
SV types: INS: insertion, DEL: deletion, DUP: duplication, INV: inversion.

|                                   | SV TYPE | All SVs |                   | Call set specific SVs |                   | SVs shared with other call sets |                   | Integrated Call sets |        |
|-----------------------------------|---------|---------|-------------------|-----------------------|-------------------|---------------------------------|-------------------|----------------------|--------|
|                                   |         | GATK-SV | Absinthe /svtools | GATK-SV               | Absinthe /svtools | GATK-SV                         | Absinthe /svtools | High-cov             | Phase3 |
| Proportion of VaPoR Supported SVs | INS     | 92.90%  | 97.60%            | 89.80%                | 96.30%            | 98.40%                          | 99.00%            | 94.93%               | 93.94% |
|                                   | DEL     | 88.00%  | 92.80%            | 71.40%                | 76.20%            | 92.60%                          | 95.30%            | 90.07%               | 89.93% |
|                                   | DUP     | 89.60%  | 88.10%            | 87.20%                | 62.70%            | 94.90%                          | 95.40%            | 89.62%               | 22.22% |
|                                   | INV     | 97.10%  | 47.60%            | 75.00%                | 44.80%            | 100%                            | 55.70%            | 83.78%               | 53.90% |
| Overlap with PacBio call sets     | INS     | 93.20%  | 97.70%            | 90.00%                | 96.60%            | 99.20%                          | 99.00%            | 95.63%               | 97.55% |
|                                   | DEL     | 90.50%  | 94.10%            | 72.10%                | 79.40%            | 96.90%                          | 97.10%            | 95.85%               | 89.71% |
|                                   | DUP     | 3.30%   | 4.50%             | 3.90%                 | 8.10%             | 1.70%                           | 2.50%             | 81.94%               | 2.14%  |
|                                   | INV     | 20.30%  | 18.10%            | 18.50%                | 13.70%            | 30.40%                          | 32.50%            | 18.58%               | 24.63% |
| <i>de novo</i> Rate               | INS     | 2.90%   | 1.90%             | 4.00%                 | 1.70%             | 0.90%                           | 2.10%             | 4.64%                | NA     |
|                                   | DEL     | 4.70%   | 1.30%             | 10.60%                | 5.30%             | 2.60%                           | 0.50%             | 2.09%                | NA     |
|                                   | DUP     | 11.90%  | 0.50%             | 13.80%                | 1.30%             | 6.90%                           | 0.00%             | 7.13%                | NA     |
|                                   | INV     | 2.80%   | 11.30%            | 2.90%                 | 13.70%            | 2.00%                           | 3.60%             | 8.11%                | NA     |



**Table S6. Counts of variants passing specified filtering criteria, related to Figure 5 and 6.** Variants passing all filtering criteria were included in haplotype phasing. PASS: sites with “PASS” in the FILTER column of the VCF, Miss.: genotype missingness; HWE: Hardy-Weinberg Equilibrium exact test p-value > 1e-10 in at least one of the five 1kGP super-populations; ME: mendelian error rate across complete trios; MAC: minor allele count. SNV: single nucleotide polymorphism, INDEL: short insertion or deletion, SV-DEL: large deletion, SV-INS: large insertion, SV-DUP: duplication, SV-INV: inversion.

| <b>Variant type</b> | <b>PASS</b> | <b>Miss.&lt; 5%</b> | <b>HWE</b>  | <b>ME ≤ 5%</b> | <b>MAC ≥ 2</b> | <b>All filters</b> |
|---------------------|-------------|---------------------|-------------|----------------|----------------|--------------------|
| SNV                 | 110,905,285 | 109,770,155         | 118,635,957 | 117,788,297    | 72,632,423     | 64,109,737*        |
| INDEL               | 14,421,124  | 16,642,357          | 18,849,519  | 18,452,006     | 14,074,540     | 9,516,672*         |
| SV-DEL              | 90,259      | 88,981              | 89,237      | 88,662         | 57,396         | 54,074             |
| SV-INS              | 49,693      | 47,493              | 48,832      | 49,183         | 35,672         | 32,548             |
| SV-DUP              | 28,242      | 25,693              | 27,831      | 27,070         | 18,496         | 15,234             |
| SV-INV              | 920         | 909                 | 882         | 868            | 689            | 603                |

\* 116,417 SNVs and 57,655 INDELS were excluded from the phased panel after haplotype phasing (see Methods). This post-phasing filtering resulted in the final count of 73,452,337 small variants (63,993,320 SNVs and 9,459,017 INDELS) and 102,459 SVs (none of the SVs had to be filtered out after phasing) included in the phased panel.
